# Supplementary material for: The NF-κB Pathway Promotes Tamoxifen Tolerance and Disease Recurrence in Estrogen Receptor–Positive Breast Cancers
Source: Oxford University Press journal article supplement (doi:10.1158/1541-7786.mcr-19-1082), 2020-04-03
Supplement: 15417786mcr191082-sup-231945_2_supp_6174942_q7v5p0.xlsx [file 15417786mcr191082-sup-231945_2_supp_6174942_q7v5p0.xlsx]

## Sheet: DE genes
	logFC	AveExpr	t	P.Value	adj.P.Val	B	GSEA_NFKB
C10orf10	2.25392	11.1756	12.704	4.04396e-23	9.13734e-19	41.8138	#N/A
NR4A1	3.07177	9.03393	12.5641	8.2663e-23	9.33885e-19	41.1223	Part of HALLMARK_TNFA_SIGNALING_VIA_NFKB
GEM	1.32308	8.83846	11.9763	1.69351e-21	1.2755e-17	38.1988	Part of HALLMARK_TNFA_SIGNALING_VIA_NFKB
CYR61	1.5752	8.48198	11.6681	8.33132e-21	4.70615e-17	36.655	#N/A
DUSP1	2.59014	8.67922	11.5092	1.89889e-20	8.58107e-17	35.8563	Part of HALLMARK_TNFA_SIGNALING_VIA_NFKB
ZFP36L2	1.56033	10.7162	11.1617	1.15543e-19	4.35115e-16	34.1048	#N/A
EGR2	1.70694	8.94393	10.9027	4.45436e-19	1.4378e-15	32.7953	Part of HALLMARK_TNFA_SIGNALING_VIA_NFKB
SLC6A9	1.82793	8.83661	10.8416	6.12705e-19	1.73051e-15	32.4859	#N/A
SCARNA17	1.14082	10.5698	10.752	9.77759e-19	2.45472e-15	32.0321	#N/A
SPRY1	1.37429	7.99471	10.714	1.19212e-18	2.6936e-15	31.8397	#N/A
KLF9	1.17986	9.34145	10.5232	3.22882e-18	6.63229e-15	30.8722	Part of HALLMARK_TNFA_SIGNALING_VIA_NFKB
ZFP36	1.63201	11.899	10.3829	6.72036e-18	1.26539e-14	30.1603	Part of HALLMARK_TNFA_SIGNALING_VIA_NFKB
CFD	1.62829	11.2919	10.127	2.55968e-17	3.61475e-14	28.8612	#N/A
EGR1	2.49925	12.4139	10.1126	2.75997e-17	3.66832e-14	28.788	Part of HALLMARK_TNFA_SIGNALING_VIA_NFKB
TSC22D3	1.39174	12.5493	9.69544	2.43939e-16	2.50537e-13	26.6706	#N/A
SLED1	1.36916	7.17115	9.65684	2.98394e-16	2.76494e-13	26.4748	#N/A
SGK1	1.12824	9.87092	9.65575	3.00094e-16	2.76494e-13	26.4693	Part of HALLMARK_TNFA_SIGNALING_VIA_NFKB
VMP1	1.18119	12.4836	9.65207	3.05924e-16	2.76494e-13	26.4506	#N/A
RNF138P1	1.06412	10.136	9.63467	3.34997e-16	2.91126e-13	26.3623	#N/A
RND3	1.18386	8.50662	9.61844	3.64619e-16	3.05132e-13	26.28	#N/A
CELF2	1.01711	8.10542	9.51626	6.21362e-16	4.84127e-13	25.7619	#N/A
GADD45A	1.07485	8.38913	9.48148	7.44933e-16	5.61058e-13	25.5856	Part of HALLMARK_TNFA_SIGNALING_VIA_NFKB
ERRFI1	1.39478	10.0734	9.36798	1.34589e-15	8.6887e-13	25.0107	#N/A
RGS2	1.33677	9.6344	9.34198	1.5411e-15	9.45195e-13	24.879	#N/A
TXNIP	1.05286	9.38849	9.34115	1.54779e-15	9.45195e-13	24.8748	#N/A
AG_1116	1.55873	8.29114	9.08347	5.91304e-15	2.969e-12	23.572	#N/A
RGS1	1.26568	6.52355	9.06143	6.63035e-15	3.2568e-12	23.4607	#N/A
JUN	1.78665	10.6313	9.04439	7.24347e-15	3.48226e-12	23.3747	Part of HALLMARK_TNFA_SIGNALING_VIA_NFKB
SERPINE1	1.80937	9.50343	9.03365	7.65903e-15	3.53175e-12	23.3205	Part of HALLMARK_TNFA_SIGNALING_VIA_NFKB
LPL	1.75246	8.31457	9.01312	8.52003e-15	3.8502e-12	23.217	#N/A
THC2663167	1.00658	9.8879	8.9877	9.7217e-15	4.30709e-12	23.0887	#N/A
FHL1	1.54903	9.17	8.96865	1.07313e-14	4.49025e-12	22.9927	#N/A
GADD45B	1.21756	10.6185	8.93778	1.25942e-14	5.17391e-12	22.8371	Part of HALLMARK_TNFA_SIGNALING_VIA_NFKB
FOS	2.48342	9.55509	8.7423	3.46498e-14	1.11845e-11	21.8534	Part of HALLMARK_TNFA_SIGNALING_VIA_NFKB
SRGN	1.28259	9.097	8.65025	5.57443e-14	1.74936e-11	21.3913	#N/A
CRYAB	1.27604	8.34531	8.62512	6.34618e-14	1.96427e-11	21.2652	#N/A
EPS8	1.04414	9.83527	8.58131	7.95497e-14	2.15206e-11	21.0456	#N/A
THC2540257	1.22553	9.98548	8.42764	1.75447e-13	3.47915e-11	20.277	#N/A
ITM2A	1.10398	8.90447	8.30749	3.25057e-13	5.69353e-11	19.6778	#N/A
ADH1A	1.64352	7.8377	8.2193	5.10579e-13	8.3598e-11	19.239	#N/A
CXCR4	1.12326	10.5652	8.19935	5.6541e-13	9.06059e-11	19.1399	#N/A
AG_0420	1.24332	9.57772	8.18502	6.08403e-13	9.4806e-11	19.0687	#N/A
CDKN1C	1.18392	8.76615	8.17929	6.26471e-13	9.69529e-11	19.0403	#N/A
CD36	1.37833	8.6221	8.14938	7.29889e-13	1.09218e-10	18.8918	#N/A
AG_1319	1.14636	9.06904	8.08593	1.00887e-12	1.39877e-10	18.5774	#N/A
JAM2	1.00514	9.19225	8.07409	1.07162e-12	1.45863e-10	18.5188	#N/A
SEPP1	1.12959	11.358	7.95511	1.96308e-12	2.25157e-10	17.9308	#N/A
FGF2	1.0841	7.25831	7.88422	2.8128e-12	2.99789e-10	17.5815	#N/A
CLEC3B	1.33565	9.23754	7.8811	2.85767e-12	3.03141e-10	17.5661	#N/A
SOD3	1.20441	10.5659	7.83273	3.65079e-12	3.59121e-10	17.3282	#N/A
DST	1.18087	8.19944	7.83238	3.65736e-12	3.59121e-10	17.3265	#N/A
F3	1.46648	8.39223	7.82852	3.72943e-12	3.61882e-10	17.3075	Part of HALLMARK_TNFA_SIGNALING_VIA_NFKB
SAA1	2.13725	8.92465	7.75029	5.53774e-12	4.70396e-10	16.9237	#N/A
VIM	1.01789	12.0166	7.61685	1.08441e-11	7.70509e-10	16.2713	#N/A
FBLN5	1.08899	10.3661	7.5674	1.38997e-11	9.29182e-10	16.0303	#N/A
ANXA1	1.23104	10.034	7.48108	2.14166e-11	1.23132e-09	15.6108	#N/A
SRPX	1.06632	8.4203	7.44724	2.53617e-11	1.39089e-09	15.4467	#N/A
TSC22D1	1.15259	11.4157	7.42925	2.77451e-11	1.4716e-09	15.3596	Part of HALLMARK_TNFA_SIGNALING_VIA_NFKB
AKR1C3	1.16081	9.40958	7.30978	5.02908e-11	2.20645e-09	14.7826	#N/A
HLF	1.22729	7.02626	7.30768	5.0819e-11	2.20818e-09	14.7724	#N/A
ADH1C	1.41609	8.06375	7.23676	7.2234e-11	2.88872e-09	14.4314	#N/A
CDR1	1.1134	12.0401	7.21619	7.9975e-11	3.12096e-09	14.3326	#N/A
ADAMTS1	1.13677	9.04123	7.18962	9.12026e-11	3.44602e-09	14.2053	#N/A
AG_2159	1.30172	9.58559	7.12516	1.2535e-10	4.34401e-09	13.8969	#N/A
MFAP4	1.42677	10.1628	7.1043	1.38909e-10	4.71268e-09	13.7973	#N/A
SPARCL1	1.09954	8.98771	7.08204	1.54989e-10	5.07312e-09	13.6912	#N/A
IRX1	1.16396	7.62904	7.078	1.58098e-10	5.1399e-09	13.6719	#N/A
DUSP6	1.00841	11.7086	6.99151	2.41665e-10	6.99158e-09	13.2606	#N/A
BTG2	1.2308	12.4267	6.98057	2.54951e-10	7.28042e-09	13.2088	Part of HALLMARK_TNFA_SIGNALING_VIA_NFKB
SLC43A2	1.04277	9.8917	6.97233	2.65441e-10	7.46903e-09	13.1697	#N/A
APOD	1.5802	8.90443	6.80722	5.93332e-10	1.33911e-08	12.3905	#N/A
MCL1	1.00304	9.42893	6.77518	6.92987e-10	1.49507e-08	12.2401	Part of HALLMARK_TNFA_SIGNALING_VIA_NFKB
IGJ	1.70284	12.1128	6.73978	8.22476e-10	1.69561e-08	12.0743	#N/A
AG_0081	1.32908	9.74571	6.7313	8.56848e-10	1.74262e-08	12.0346	#N/A
IER3	1.03732	8.82766	6.64409	1.30452e-09	2.3964e-08	11.6278	Part of HALLMARK_TNFA_SIGNALING_VIA_NFKB
OLFM4	1.26303	6.84691	6.60995	1.53697e-09	2.7131e-08	11.4691	#N/A
KLF2	1.13395	11.3561	6.58817	1.7062e-09	2.91438e-08	11.368	Part of HALLMARK_TNFA_SIGNALING_VIA_NFKB
AG_1672	1.19242	10.7697	6.56665	1.89143e-09	3.14242e-08	11.2683	#N/A
COL17A1	1.5131	8.20625	6.55028	2.04554e-09	3.32989e-08	11.1925	#N/A
SAA2	1.25725	7.74357	6.51306	2.44348e-09	3.78135e-08	11.0206	#N/A
AG_4499	1.33344	10.7998	6.43722	3.50583e-09	4.98203e-08	10.6715	#N/A
EGR3	1.15038	8.55884	6.35	5.29898e-09	6.77975e-08	10.2721	Part of HALLMARK_TNFA_SIGNALING_VIA_NFKB
HBB	1.52235	11.7167	6.32146	6.0629e-09	7.49405e-08	10.142	#N/A
PI16	1.87526	10.3605	6.31489	6.25352e-09	7.65429e-08	10.1121	#N/A
TGFBR3	1.20234	8.38182	6.31177	6.34606e-09	7.73822e-08	10.0979	#N/A
G0S2	1.73487	9.4272	6.28432	7.22164e-09	8.55205e-08	9.973	Part of HALLMARK_TNFA_SIGNALING_VIA_NFKB
DPT	1.04504	11.9905	6.25396	8.3284e-09	9.49437e-08	9.83526	#N/A
AB051444	1.16666	10.0176	6.24418	8.71945e-09	9.80563e-08	9.79094	#N/A
TRHDE-AS1	1.0829	7.1216	6.20321	1.05641e-08	1.13288e-07	9.6056	#N/A
MT1M	1.07253	9.748	6.05309	2.12396e-08	1.93863e-07	8.93144	#N/A
C11orf96	1.05534	11.1556	5.89811	4.33327e-08	3.39142e-07	8.24382	#N/A
ANGPTL4	1.03814	11.2501	5.89395	4.41638e-08	3.43742e-07	8.2255	#N/A
CCDC80	1.1278	10.1742	5.82229	6.12296e-08	4.48455e-07	7.91068	#N/A
FOSB	1.19832	12.568	5.7679	7.83616e-08	5.51068e-07	7.67306	Part of HALLMARK_TNFA_SIGNALING_VIA_NFKB
PTGES	1.26995	9.37678	5.7613	8.07372e-08	5.6531e-07	7.6443	#N/A
DCN	1.04874	12.2476	5.55964	1.99475e-07	1.18298e-06	6.77403	#N/A
AG_0828	1.08004	12.86	5.47007	2.96563e-07	1.65698e-06	6.39293	#N/A
DGAT2	1.08144	9.29595	5.40831	3.89092e-07	2.07887e-06	6.13214	#N/A
MAOA	1.08269	10.7897	5.25502	7.58193e-07	3.6283e-06	5.49211	#N/A
TPSAB1	1.0274	9.93777	5.17598	1.06524e-06	4.84483e-06	5.16628	#N/A
ENST00000390323	1.02544	12.8012	4.74467	6.47507e-06	2.30219e-05	3.44189	#N/A
ENST00000390243	1.13179	11.2923	4.47396	1.91808e-05	5.99599e-05	2.40927	#N/A
ADAMTS8	1.04156	7.67802	4.41425	2.42461e-05	7.37535e-05	2.18702	#N/A
PIGR	1.33127	8.62167	4.21384	5.2489e-05	0.000146545	1.45625	#N/A
ENST00000390615	1.14198	12.431	4.15329	6.59938e-05	0.000179438	1.24017	#N/A
CILP	1.00958	9.07835	4.04681	9.82018e-05	0.000255659	0.865706	#N/A
CXCL14	1.02583	11.2245	3.68562	0.000359587	0.000822189	-0.350414	#N/A
MUCL1	1.51956	10.0376	3.30292	0.0013006	0.0026356	-1.54205	#N/A
ENST00000527562	-1.94035	10.4328	-9.82159	1.26237e-16	1.58463e-13	27.3108	#N/A
REXO1L1P	-2.35359	10.4517	-9.77558	1.60526e-16	1.90899e-13	27.0773	#N/A
MUC17	-1.30964	8.403	-9.73594	1.97449e-16	2.1641e-13	26.8761	#N/A
ENDOU	-1.53767	7.55685	-9.7324	2.01133e-16	2.1641e-13	26.8581	#N/A
LOC102724676	-1.90716	8.79592	-9.58515	4.33782e-16	3.50047e-13	26.1112	#N/A
TRIM53AP	-1.83348	8.43511	-9.44307	9.10069e-16	6.63323e-13	25.391	#N/A
OR5H14	-1.54249	6.89783	-9.42382	1.0061e-15	7.09201e-13	25.2935	#N/A
USP17L7	-1.87159	10.1126	-9.41636	1.04602e-15	7.09201e-13	25.2557	#N/A
ERVH-4	-1.45617	12.9341	-9.41251	1.06718e-15	7.09201e-13	25.2362	#N/A
PRAMEF4	-2.19708	8.26628	-9.31117	1.80927e-15	1.0758e-12	24.7231	#N/A
REXO1L2P	-1.60646	9.69323	-9.18	3.58043e-15	1.97317e-12	24.0596	#N/A
IGFL3	-1.18339	10.937	-9.12799	4.69203e-15	2.42905e-12	23.7968	#N/A
FAM230B	-1.28258	8.29218	-9.12643	4.73017e-15	2.42905e-12	23.789	#N/A
LOC143666	-1.10152	10.623	-9.03631	7.55386e-15	3.53175e-12	23.334	#N/A
USP17L25	-1.36229	10.6345	-8.9751	1.03785e-14	4.44159e-12	23.0252	#N/A
ACTR3BP2	-1.01994	7.89907	-8.97436	1.04184e-14	4.44159e-12	23.0214	#N/A
KRTAP6-2	-1.23962	8.40883	-8.92563	1.34129e-14	5.41188e-12	22.7759	#N/A
SERPINB10	-1.52352	6.90672	-8.91047	1.45101e-14	5.75185e-12	22.6994	#N/A
KIR2DS2	-1.66865	8.50048	-8.87776	1.71895e-14	6.47327e-12	22.5347	#N/A
AF359419	-1.22846	7.77355	-8.86112	1.87374e-14	6.9405e-12	22.4509	#N/A
SSX4B	-1.36313	7.4303	-8.8465	2.02102e-14	7.2484e-12	22.3774	#N/A
GOLGA6A	-1.21214	7.94058	-8.80137	2.55294e-14	8.87443e-12	22.1503	#N/A
LOC440040	-1.18244	6.76944	-8.7673	3.04485e-14	1.03093e-11	21.979	#N/A
OR7E91P	-1.28685	9.02021	-8.76653	3.05697e-14	1.03093e-11	21.9752	#N/A
SLC9B1	-1.38951	7.67162	-8.75792	3.19617e-14	1.06202e-11	21.9319	#N/A
GAGE3	-1.61701	7.80264	-8.74843	3.35701e-14	1.0993e-11	21.8842	#N/A
IFNA6	-1.48951	6.86844	-8.60763	6.94549e-14	2.12072e-11	21.1775	#N/A
KIR2DS1	-1.36298	7.90724	-8.60317	7.10716e-14	2.14115e-11	21.1552	#N/A
DPPA2	-1.0936	6.47389	-8.58887	7.65091e-14	2.15206e-11	21.0835	#N/A
DDX11L2	-1.02924	9.43097	-8.58807	7.68256e-14	2.15206e-11	21.0795	#N/A
FOXD4L5	-1.35944	9.40376	-8.58756	7.70279e-14	2.15206e-11	21.077	#N/A
MUC12	-1.36937	7.76137	-8.57339	8.28631e-14	2.15206e-11	21.006	#N/A
OR2T8	-1.14752	7.33901	-8.56065	8.84861e-14	2.23216e-11	20.9422	#N/A
TRIM64	-1.32634	6.76095	-8.55703	9.01552e-14	2.23852e-11	20.924	#N/A
IFNA5	-1.49323	7.25195	-8.52464	1.06524e-13	2.5653e-11	20.7619	#N/A
DRD5	-1.3454	7.25979	-8.52428	1.06722e-13	2.5653e-11	20.7601	#N/A
ZNF705G	-1.09897	7.23751	-8.51977	1.09226e-13	2.57966e-11	20.7375	#N/A
ADAM6	-1.4322	7.17817	-8.5191	1.09603e-13	2.57966e-11	20.7342	#N/A
HUS1	-1.12753	8.57844	-8.4697	1.41333e-13	3.1308e-11	20.4871	#N/A
TRIM51	-1.44955	8.68491	-8.46744	1.42978e-13	3.1365e-11	20.4759	#N/A
LOC284344	-1.45343	7.40649	-8.45507	1.52373e-13	3.20814e-11	20.414	#N/A
PRAMEF5	-1.38609	8.08474	-8.45392	1.53281e-13	3.20814e-11	20.4082	#N/A
DEFA1	-1.55328	6.8916	-8.45377	1.53394e-13	3.20814e-11	20.4075	#N/A
FLJ12825	-1.25069	7.49519	-8.45027	1.56183e-13	3.20814e-11	20.39	#N/A
LINC00934	-1.02157	6.85192	-8.43928	1.65261e-13	3.36402e-11	20.3351	#N/A
KIR2DL2	-1.41933	7.47671	-8.42772	1.75372e-13	3.47915e-11	20.2774	#N/A
GOLGA6L6	-1.0708	8.71059	-8.42754	1.75536e-13	3.47915e-11	20.2765	#N/A
SPRR2A	-1.29937	7.52424	-8.42063	1.81882e-13	3.54277e-11	20.242	#N/A
PAGE2	-1.04105	7.36537	-8.37028	2.35553e-13	4.43526e-11	19.9907	#N/A
LOC399900	-1.50708	9.01448	-8.354	2.56073e-13	4.7818e-11	19.9095	#N/A
SPATA31A3	-1.0363	6.89129	-8.34922	2.62431e-13	4.86035e-11	19.8857	#N/A
VN1R4	-1.06147	6.47612	-8.33773	2.7837e-13	5.03182e-11	19.8284	#N/A
CFHR1	-1.14127	6.51321	-8.30466	3.2981e-13	5.73235e-11	19.6637	#N/A
SLC17A4	-1.15141	6.86677	-8.27155	3.90774e-13	6.63876e-11	19.4988	#N/A
FAM27L	-1.088	9.19574	-8.26737	3.99228e-13	6.73175e-11	19.4781	#N/A
KIR2DL4	-1.08415	7.9497	-8.25074	4.34703e-13	7.27563e-11	19.3953	#N/A
PRAMEF15	-1.1708	7.25861	-8.21445	5.23412e-13	8.50827e-11	19.2149	#N/A
GUF1	-1.03495	9.27782	-8.1935	5.82569e-13	9.23723e-11	19.1109	#N/A
PRAMEF11	-1.11393	7.66917	-8.19054	5.91464e-13	9.28065e-11	19.0962	#N/A
SPATA31D3	-1.05062	7.34119	-8.15788	6.98882e-13	1.05982e-10	18.934	#N/A
AG_0145	-1.03188	9.31848	-8.12411	8.30351e-13	1.2183e-10	18.7666	#N/A
OR1D5	-1.02058	7.3249	-8.12061	8.45337e-13	1.23228e-10	18.7492	#N/A
OTOP1	-1.06156	8.10986	-8.07187	1.08382e-12	1.4664e-10	18.5078	#N/A
SSX2	-1.00102	8.195	-8.03534	1.30545e-12	1.72434e-10	18.327	#N/A
TRIM49	-1.27247	9.88439	-8.03426	1.31262e-12	1.72434e-10	18.3217	#N/A
PRAMEF2	-1.0401	6.82939	-8.03052	1.33787e-12	1.74735e-10	18.3032	#N/A
SPIC	-1.05404	7.48052	-8.02463	1.3786e-12	1.78675e-10	18.2741	#N/A
MGC39584	-1.18907	7.05943	-8.02286	1.39107e-12	1.78675e-10	18.2653	#N/A
GSTA5	-1.16264	6.58603	-8.0221	1.39641e-12	1.78675e-10	18.2616	#N/A
OR52A4	-1.18589	6.53342	-8.01114	1.47654e-12	1.84464e-10	18.2074	#N/A
OR1S1	-1.05737	7.51528	-8.01051	1.48123e-12	1.84464e-10	18.2043	#N/A
LPAL2	-1.14634	7.56695	-7.9764	1.76176e-12	2.10619e-10	18.0359	#N/A
S100A7L2	-1.01059	6.55088	-7.96227	1.89291e-12	2.19335e-10	17.9661	#N/A
DPH5	-1.02664	10.936	-7.95336	1.98052e-12	2.26009e-10	17.9222	#N/A
KRTAP21-1	-1.19408	8.58181	-7.92692	2.26514e-12	2.52122e-10	17.7918	#N/A
CLEC2B	-1.00316	10.4226	-7.91207	2.44237e-12	2.6789e-10	17.7186	#N/A
SSX1	-1.20046	6.85025	-7.87733	2.9127e-12	3.06105e-10	17.5476	#N/A
GGT8P	-1.34354	7.56677	-7.84967	3.35082e-12	3.42587e-10	17.4115	#N/A
LOC100271840	-1.3699	6.76052	-7.83296	3.64654e-12	3.59121e-10	17.3294	#N/A
USP17L1P	-1.35194	9.73416	-7.81291	4.03582e-12	3.81545e-10	17.2309	#N/A
LINC00298	-1.04691	6.59404	-7.80475	4.20583e-12	3.93608e-10	17.1908	#N/A
ENST00000393522	-1.0382	7.37188	-7.79933	4.32265e-12	3.98654e-10	17.1642	#N/A
ENST00000577456	-1.33724	7.07129	-7.79187	4.48881e-12	4.10626e-10	17.1276	#N/A
H2BFM	-1.18009	7.70689	-7.78203	4.71763e-12	4.21324e-10	17.0793	#N/A
FRG2	-1.18957	7.55526	-7.77441	4.90285e-12	4.31051e-10	17.0419	#N/A
FAM213B	-1.04474	8.96028	-7.71641	6.5699e-12	5.33981e-10	16.7577	#N/A
KRTAP19-1	-1.34406	10.7596	-7.69908	7.16972e-12	5.6842e-10	16.6729	#N/A
VCX	-1.11687	9.28428	-7.67913	7.92747e-12	6.21838e-10	16.5754	#N/A
TPTE2P3	-1.01157	7.47133	-7.67427	8.12388e-12	6.28627e-10	16.5516	#N/A
PSG8	-1.04785	8.01141	-7.64521	9.40317e-12	7.01204e-10	16.4097	#N/A
LOC101927530	-1.40669	11.553	-7.52118	1.75234e-11	1.08775e-09	15.8055	#N/A
PRAMEF14	-1.13546	6.9346	-7.49771	1.97074e-11	1.16862e-09	15.6915	#N/A
OR6P1	-1.07544	7.17205	-7.44731	2.53534e-11	1.39089e-09	15.447	#N/A
OPRM1	-1.01939	6.75888	-7.43369	2.71366e-11	1.45297e-09	15.3811	#N/A
OR4F4	-1.00313	8.19064	-7.38803	3.40757e-11	1.72632e-09	15.1601	#N/A
GAGE7	-1.17274	9.57171	-7.38752	3.41624e-11	1.72685e-09	15.1577	#N/A
IFNA14	-1.18432	6.49749	-7.37814	3.57968e-11	1.78549e-09	15.1123	#N/A
LINC01123	-1.01436	11.204	-7.37378	3.65826e-11	1.80929e-09	15.0913	#N/A
AF242527	-1.0107	7.57343	-7.37271	3.67783e-11	1.81047e-09	15.0861	#N/A
ENST00000399894	-1.0409	8.02417	-7.36636	3.7959e-11	1.85087e-09	15.0554	#N/A
IL20	-1.17547	8.64724	-7.36527	3.81661e-11	1.85087e-09	15.0502	#N/A
KRTAP4-11	-1.1675	7.81757	-7.36523	3.81724e-11	1.85087e-09	15.05	#N/A
FAM74A3	-1.01135	8.05032	-7.34497	4.22208e-11	1.97593e-09	14.9522	#N/A
OR5AK2	-1.17618	6.66609	-7.33994	4.32907e-11	2.02098e-09	14.9279	#N/A
ENST00000319509	-1.04303	7.28474	-7.31311	4.94649e-11	2.19149e-09	14.7986	#N/A
SEMG2	-1.00338	6.62152	-7.29286	5.46962e-11	2.34955e-09	14.7011	#N/A
TCONS_l2_00009528	-1.00471	7.3866	-7.22194	7.77299e-11	3.04914e-09	14.3603	#N/A
THC2487011	-1.42504	9.48547	-7.21115	8.19929e-11	3.17034e-09	14.3085	#N/A
USP17L8	-1.17911	9.61909	-7.20888	8.29194e-11	3.19176e-09	14.2976	#N/A
SPANXN3	-1.09632	6.77859	-7.17635	9.73787e-11	3.61293e-09	14.1417	#N/A
PAGE2B	-1.11479	8.4398	-7.16316	1.03931e-10	3.76364e-09	14.0786	#N/A
OR7A10	-1.08598	8.05777	-7.11129	1.34211e-10	4.60166e-09	13.8307	#N/A
PSG6	-1.06261	7.6073	-7.09765	1.43529e-10	4.81878e-09	13.7656	#N/A
PRAMEF3	-1.03513	6.24711	-7.04026	1.90291e-10	5.94692e-09	13.4923	#N/A
AG_1993	-1.11563	7.71444	-7.02939	2.00717e-10	6.17875e-09	13.4406	#N/A
IFNA7	-1.08481	6.96832	-6.97951	2.56283e-10	7.29308e-09	13.2037	#N/A
SPANXD	-1.23715	7.21095	-6.91149	3.57303e-10	9.33325e-09	12.8817	#N/A
CEP83-AS1	-1.0558	9.44125	-6.88626	4.04058e-10	1.01667e-08	12.7626	#N/A
THC2740296	-1.22961	10.9238	-6.85916	4.6101e-10	1.11288e-08	12.6349	#N/A
CLEC4F	-1.00755	7.73045	-6.84835	4.85896e-10	1.15432e-08	12.584	#N/A
LOC729444	-1.19922	7.77827	-6.7865	6.56012e-10	1.4363e-08	12.2932	#N/A
DUX3	-1.03935	8.00723	-6.64118	1.32289e-09	2.41834e-08	11.6142	#N/A
SPANXC	-1.13162	7.29906	-6.60611	1.56558e-09	2.74554e-08	11.4512	#N/A
MGC39545	-1.00407	6.25721	-6.59161	1.67829e-09	2.87935e-08	11.384	#N/A
NP373359	-1.09756	8.74922	-6.55003	2.04797e-09	3.33145e-08	11.1914	#N/A
LOC101930441	-1.02652	12.3557	-6.43753	3.50079e-09	4.97799e-08	10.6729	#N/A
SCRT2	-1.06521	7.67772	-6.4276	3.66967e-09	5.17902e-08	10.6273	#N/A
MUC4	-1.04457	13.3927	-6.19068	1.12013e-08	1.18991e-07	9.54903	#N/A
